# Supplementary material for: Labdanum Resin from Cistus ladanifer L. as a Source of Compounds with Anti-Diabetic, Neuroprotective and Anti-Proliferative Activity
Source: MDPI journal article supplement (doi:10.3390/molecules29102222), 2024-05-09
Supplement: s1 [file s1]

Supplementary material

# Labdanum Resin from *Cistus ladanifer* L. as a Source of Compounds with Anti-Diabetic, Neuroprotective and Anti-Proliferative Activity

David F. Frazão <sup>1,2,3</sup>, Carlos Martins-Gomes <sup>1</sup>, Teresa Sosa Díaz <sup>4</sup>, Fernanda Delgado <sup>2,5</sup>, José C. Gonçalves <sup>2,5</sup> and Amélia M. Silva <sup>1,6\*</sup>

<sup>1</sup> Center for Research and Technology of Agro-Environmental and Biological Sciences (CITAB-UTAD), University of Trás-os-Montes e Alto Douro (UTAD), Quinta de Prados, 5001-801 Vila Real, Portugal; davidmfrazao@gmail.com (D.F.F.); camgomes@utad.pt (C.M.-G.)

<sup>2</sup> Plant Biotechnology Center of Beira Interior (CBPBI), Quinta da Senhora de Mércules, Apartado 119, 6001-909 Castelo Branco, Portugal; fdelgado@ipcb.pt (F.D.); jcgoncalves@ipcb.pt (J.C.G.)

<sup>3</sup> Mediterranean Institute for Agriculture, Environment and Development (MED) & Global Change and Sustainability Institute (CHANGE), CEBAL, 7801-908 Beja, Portugal

<sup>4</sup> Department of Plant Biology, Ecology and Earth Sciences, Faculty of Science, University of Extremadura, 06006 Badajoz, Spain; tesosa@unex.es

<sup>5</sup> Research Centre for Natural Resources, Environment and Society (CERNAS), Polytechnic Institute of Castelo Branco (IPCB), Quinta da Senhora de Mércules, Apartado 119, 6001-909 Castelo Branco, Portugal;

<sup>6</sup> Department of Biology and Environment, School of Life Sciences and Environment, UTAD, Quinta de Prados; 5001-801 Vila Real, Portugal

\* Correspondence: : amsilva@utad.pt (A.M.S.); Tel.: +351-259-350-921 (A.M.S.)

## Contents:

**Figure S1.** GC-EI-MS chromatograms of the TMCS + BSTFA derivatized absolute of the labdanum resin obtained by the Andalusian process (peak numbers according to Table 2).

**Figure S2.** GC-EI-MS chromatograms of the TMCS + BSTFA diterpenoid fraction of the labdanum resin obtained by the Andalusian process (peak numbers according to Table 2),

**Figure S3.** GC-EI-MS chromatograms of the TMCS + BSTFA flavonoid fraction of the labdanum resin obtained by the Andalusian process (peak numbers according to Table 2).

**Figure S4.** GC-EI-MS chromatograms of the TMCS + BSTFA derivatized absolute of the labdanum resin obtained by the Zamorean process (peak numbers according to Table 2).

**Figure S5.** Four-parameter symmetric sigmoidal curves of HepG2 cell viability, as percentage in relation to the control (0.00 µg/mL), versus Adl labdanum absolute and fractions concentration at 24 h and 48 h incubation (regression parameters in Table S1).

**Figure S6.** Four-parameter symmetric sigmoidal curves of Caco-2 cell viability, as percentage in relation to the control (0.00 µg/mL), versus Adl labdanum absolute and fractions concentration at 24 h and 48 h incubation (regression parameters in Table S1).

**Table S1:** R-squared and Hill slope of the best fitted symmetric sigmoidal curves to the HepG2, and Caco-2 cell viability versus labdanum absolutes, and its Flv and Dit fraction, concentration data at 24 h and 48 h incubation.

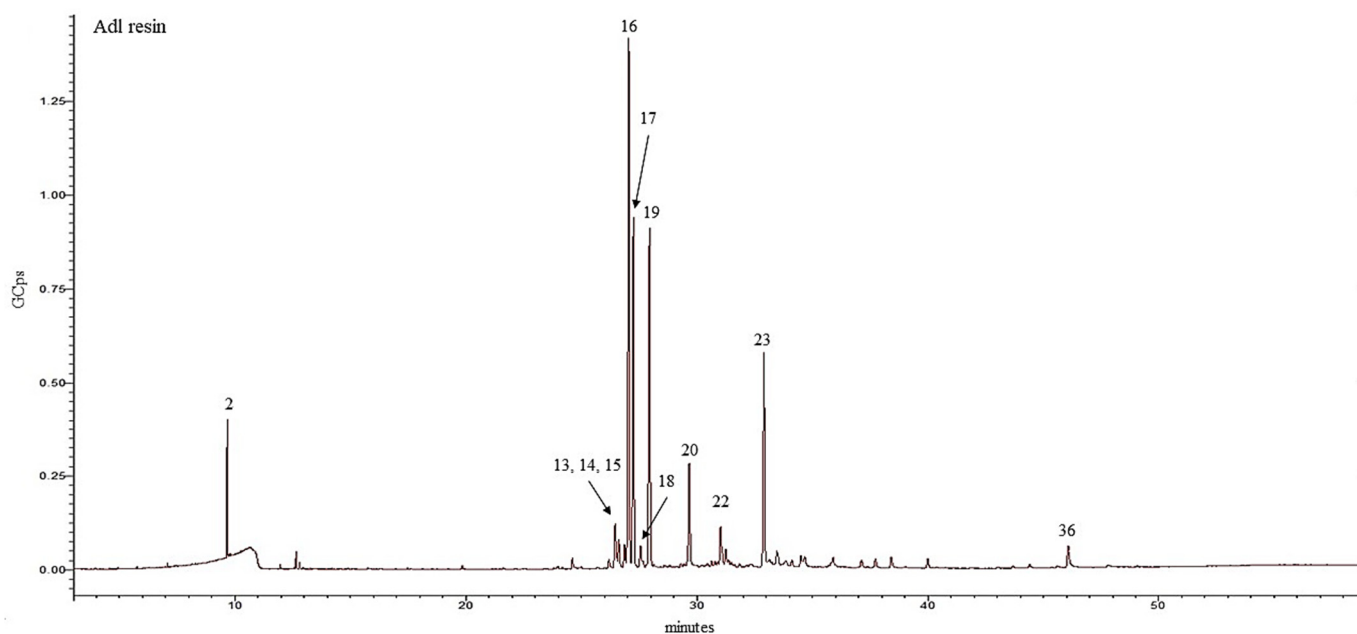

**Figure S1.** GC-EI-MS chromatograms of the TMCS + BSTFA derivatized absolute of the labdanum resin obtained by the Andalusian process (peak numbers according to Table 2).

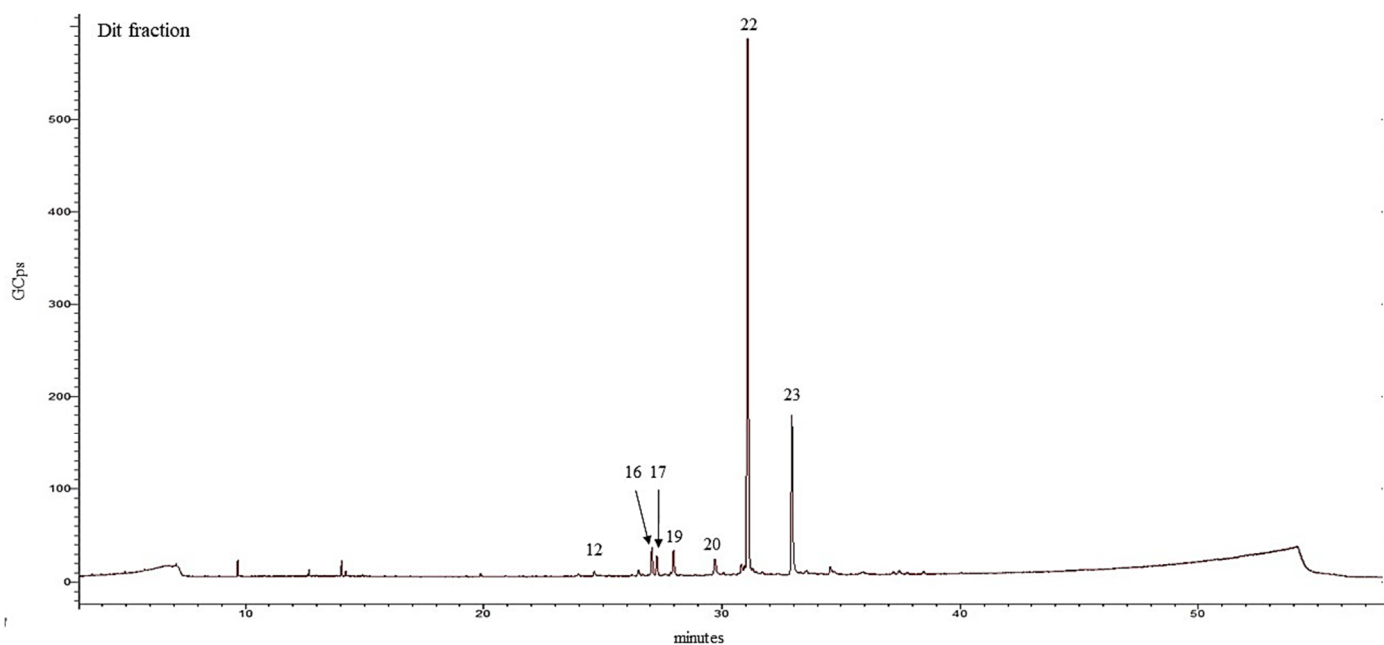

**Figure S2.** GC-EI-MS chromatograms of the TMCS + BSTFA diterpenoid fraction of the labdanum resin obtained by the Andalusian process (peak numbers according to Table 2).

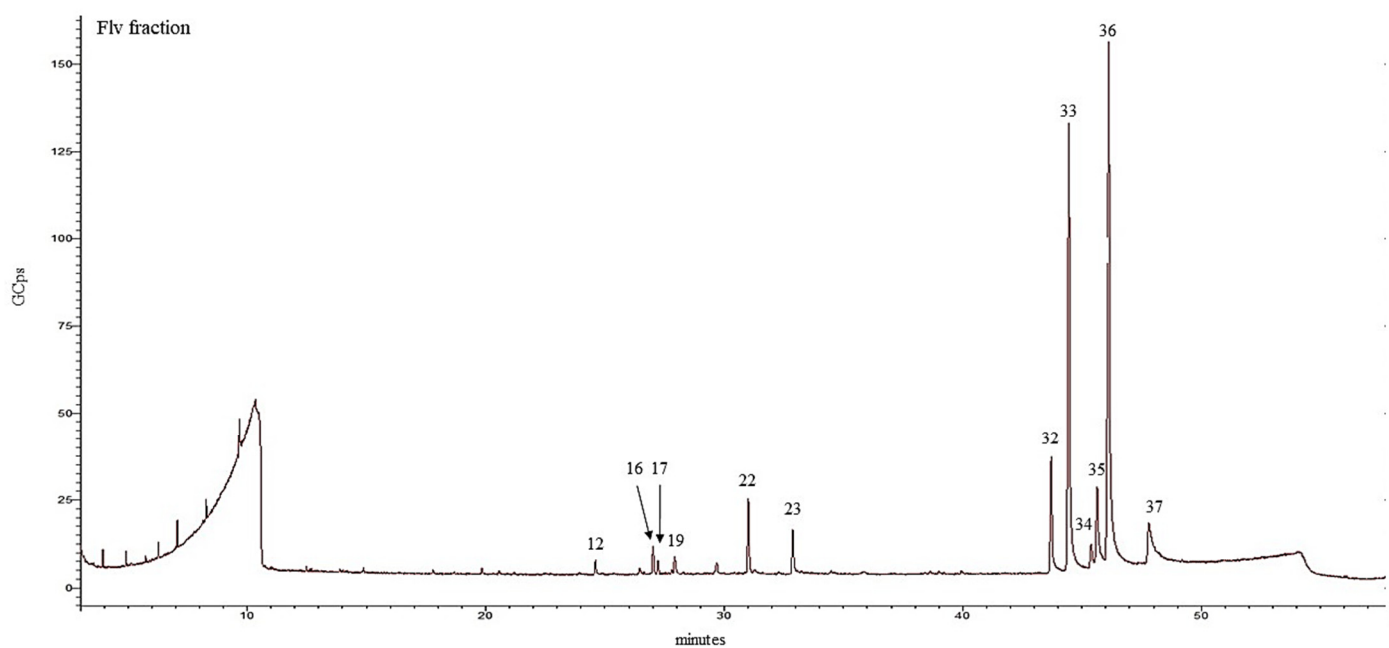

**Figure S3.** GC-EI-MS chromatograms of the TMCS + BSTFA flavonoid fraction of the labdanum resin obtained by the Andalusian process (peak numbers according to Table 2).

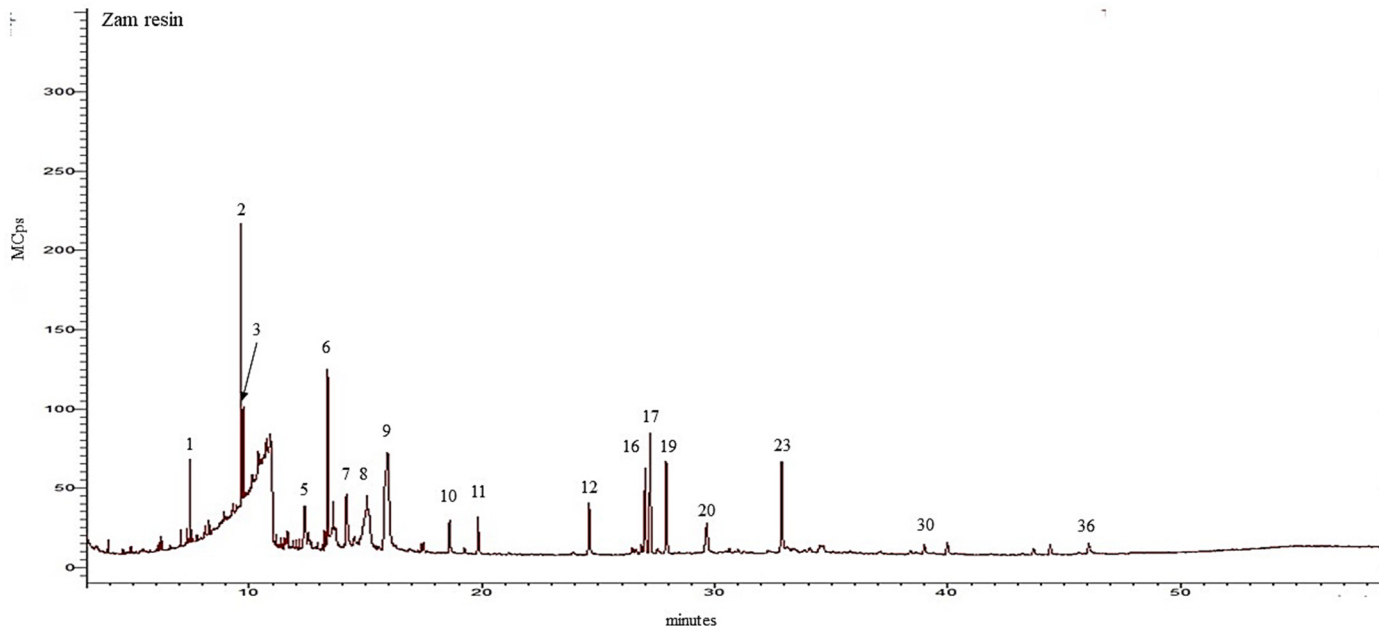

**Figure S4.** GC-EI-MS chromatograms of the TMCS + BSTFA derivatized absolute of the labdanum resin obtained by the Zamorean process (peak numbers according to Table 2).

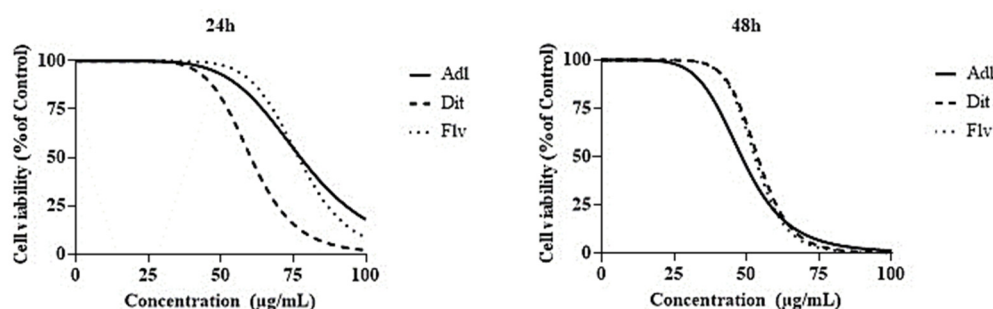

**Figure S5.** Four-parameter symmetric sigmoidal curves of HepG2 cell viability, as percentage in relation to the control (0.00  $\mu\text{g/mL}$ ), versus Adl labdanum absolute and fractions concentration at 24 h and 48 h incubation (regression parameters in Table S1).

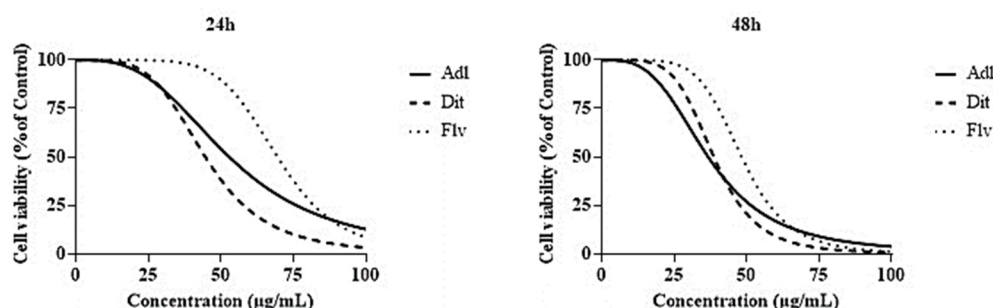

**Figure S6.** Four-parameter symmetric sigmoidal curves of Caco-2 cell viability, as percentage in relation to the control (0.00  $\mu\text{g/mL}$ ), versus Adl labdanum absolute and fractions concentration at 24 h and 48 h incubation (regression parameters in Table S1).

**Table S1:** R-squared and Hill slope of the best fitted symmetric sigmoidal curves to the HepG2, and Caco-2 cell viability versus labdanum absolutes, and its Flv and Dit fraction, concentration data at 24 h and 48 h incubation.

| Cell   | Extract | Incubation | R <sup>2</sup> | Hill Slope          |
|--------|---------|------------|----------------|---------------------|
| Caco-2 | Adl     | 24 h       | 0.9574         | -3.020 $\pm$ 0.706  |
|        |         | 48 h       | 0.9883         | -3.246 $\pm$ 0.419  |
|        | Dit     | 24 h       | 0.9464         | -4.216 $\pm$ 1.533  |
|        |         | 48 h       | 0.9904         | -5.223 $\pm$ 0.849  |
|        | Flv     | 24 h       | 0.9843         | -6.576 $\pm$ 1.168  |
|        |         | 48 h       | 0.9755         | -6.034 $\pm$ 2.667  |
| HepG2  | Adl     | 24 h       | 0.9335         | -5.951 $\pm$ 1.858  |
|        |         | 48 h       | 0.9942         | -6.001 $\pm$ 1.221  |
|        | Dit     | 24 h       | 0.9817         | -7.776 $\pm$ 1.422  |
|        |         | 48 h       | 0.9178         | -9.707 $\pm$ 8.163  |
|        | Flv     | 24 h       | 0.9465         | -8.959 $\pm$ 3.892  |
|        |         | 48 h       | 0.9934         | -10.110 $\pm$ 3.440 |

Values presented as mean  $\pm$  standard deviation (3 independent experiments of  $n = 4$ ). At each data point, top and bottom plateaus were set at 100 and 0%, respectively. Zam resin did not induce cell viability reduction.
